# Supplementary material
Source: Royal Society of Chemistry journal article supplement (doi:10.1039/d6fd00086j)
Supplement: d6fd00086j1.pdf [file d6fd00086j1.pdf]

## Supplementary Information: Advances in the Projected Forces and Momenta Decoherence Method for Attosecond Nonadiabatic Molecular Dynamics

Gilbert Grell<sup>a,†</sup>, Joachim Galiana<sup>b</sup>, Stefano M. Cavaletto<sup>b</sup>, Jesús González-Vázquez<sup>b</sup>, Alicia Palacios<sup>b,c</sup>, and Fernando Martín<sup>a,b,\*</sup>

The Supplementary Information (SI) for the article "Advances in the Projected Forces and Momenta Decoherence Method for Attosecond Nonadiabatic Molecular Dynamics" contains: (i) additional explanations of the inactive-potential momentum propagation for the FM decoherence correction in presence of a laser field; (ii) additional figures and analysis for the ring-opening and ring-closing dynamics in the 1,2-dithiane molecule; (iii) the optimized ground-state geometries and harmonic frequencies used to build the Wigner distribution for all molecules.

---

<sup>a</sup>Instituto Madrileño de Estudios Avanzados en Nanociencia (IMDEA-Nanociencia), Cantoblanco, 28049 Madrid, Spain.

<sup>b</sup>Departamento de Química, Módulo 13, Universidad Autónoma de Madrid, 28049 Madrid, Spain

<sup>c</sup>Condensed Matter Physics Center (IFIMAC), Universidad Autónoma de Madrid, 28049 Madrid, Spain.

<sup>†</sup>E-mail: gilbert.grell@imdea.org

<sup>\*</sup>E-mail: fernando.martin@uam.es

## S1 TSH-FM decoherence: Auxiliary momentum propagation with an explicit laser field

As outlined briefly in Sect. 2.2 of the main text, in the presence of a laser, the energy for a surface hop is understood to be absorbed from the field and the trajectory velocity is not adjusted to conserve energy if the hop occurs to a potential within the laser bandwidth<sup>?</sup>. For the FM decoherence correction, Eq. (5) of the main text, the inactive-potential population is interpreted as corresponding to wave packets traveling on auxiliary trajectories, defined in terms of their inactive-potential auxiliary forces and momenta, as detailed in Ref. ? . An inactive-potential population increase is interpreted similar to a surface hop, i.e., requiring an energy-conserving correction in the field-free case but not in presence of an external field from which the necessary energy is absorbed. The energy-conserving auxiliary momentum propagation outlined in Section 2.6 of Ref. ? , needs thus to be adapted as follows.

An inactive,  $i$ , (field-adiabatic) potential bearing a population above a threshold,  $\eta$ , is understood to harbor an auxiliary wave packet, the momentum of which has been propagated from the initial condition  $P_i^f(0) = P_a^f(0) = P^f(0)$  at  $t = 0$  according to the field-adiabatic force,  $F_i^f(t)$ . Sub-threshold populated potentials do not carry an auxiliary wave packet and the active-potential momentum is used.

$$P_i^f(t + \Delta t) = \begin{cases} P_i^f(t) + F_i^f(t)\Delta t, & |c_i^f(t)|^2 \geq \eta \\ P_a^f(t + \Delta t), & |c_i^f(t)|^2 < \eta \end{cases} \quad (\text{S1})$$

Here, the superscript  $f$  has been employed to indicate the field-adiabatic basis in presence of a laser field, see Sect. 2.2 of the main text. If the population of an inactive potential,  $i$ , falls below  $\eta$  during the propagation, its auxiliary wave packet has decohered and the remaining population is moved to the active potential,  $a$ , changing the momentum propagation from Eq. (??) to Eq. (??), effectively switching off decoherence, since  $P_{ia}^f(t) = P_i^f(t) - P_a^f(t) = 0$  for these potentials, see Eq. (5) of the main text. If, in turn, the population of an inactive potential rises above  $\eta$ , it is interpreted as the birth of a new wave packet and the momentum propagation changes to Eq. (??). Finally, an increase of the inactive-potential population is interpreted as an excitation of a small wave packet from the active potential and the momentum propagation in Eq. (??) is modified by injecting active-potential momentum in proportion to the population increase,  $\Delta\rho_{ii}^f(t) = \max\{0, |c_i^f(t)|^2 - |c_i^f(t - \Delta t)|^2\}$ .

$$P_i^f(t) = P_i^f(t) \left( 1 - \frac{\Delta\rho_{ii}^f(t)}{|c_i^f(t)|^2} \right) + \frac{\Delta\rho_{ii}^f(t)}{|c_i^f(t)|^2} P_a^f(t) \quad (\text{S3})$$

## S2 1,2-dithiane

Herein, additional data regarding the ring-opening dynamics in 1,2-dithiane is shown in Fig. ??. The panels (a)-(c), respectively, depict for the TSH-PFM<sup>?</sup>, TSH-EDC<sup>?</sup>, and TSH-ND<sup>?</sup> approaches, the comparison of the adiabatic electronic populations,  $\rho_{jj}(t)$ , and fractions of active trajectories,  $\Pi_j(t)$ , for the  $S_0$ ,  $S_1$ , and  $S_2$  potentials in the sub-panels (a1)-(c1). While the TSH-PFM and TSH-EDC trajectory ensembles show almost perfect internal consistency, i.e.,  $\rho_{jj}(t) \approx \Pi_j(t)$ , see Eq. (A.1) of Appendix A to the main text, TSH-ND violates internal consistency. After the first 50 fs, however, the TSH-ND fraction of active trajectories resembles the TSH-PFM and TSH-EDC values considerably better than the TSH-ND electronic populations. As the gradients and thus the nuclear dynamics are determined by the active potential, this explains why the TSH-ND simulation predicts almost the same structural dynamics as the TSH-PFM and TSH-EDC simulations, see Fig. 6 of the main text, although the TSH-ND electronic populations differ considerably from the TSH-PFM and TSH-EDC results. Panels (a2)-(c2) show the ensemble-averaged  $S_0$ ,  $S_1$ ,  $S_2$  potential energy evolutions obtained with the respective methods. As expected from the aforementioned observation that the fraction of active trajectories is quite similar between all TSH approaches, the TSH-PFM, TSH-EDC, and TSH-ND average potential energies show only minute differences.

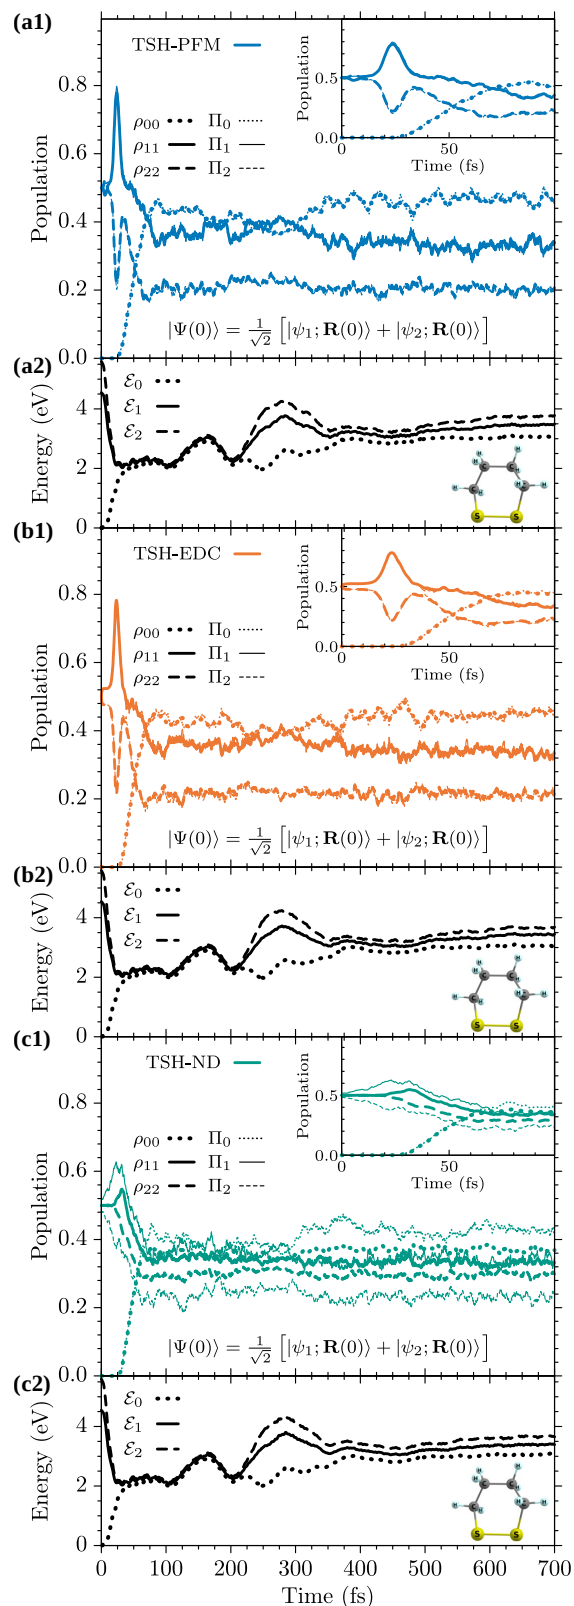

**Fig. S1** Nonadiabatic dynamics in 1,2-dithiane after a 50:50  $S_1$ - $S_2$  coherent superposition,  $|\Psi(0)\rangle = \frac{1}{\sqrt{2}} [|\psi_1; \mathbf{R}(0)\rangle + |\psi_2; \mathbf{R}(0)\rangle]$ . (a1) TSH-PFM adiabatic electronic populations,  $\rho_{jj}(t)$  (thick), and fractions of active trajectories,  $\Pi_j(t)$  (thin), for the  $S_0$  (dotted),  $S_1$  (solid), and  $S_2$  (dashed), i.e.,  $j = 0, 1, 2$ , adiabatic electronic potentials. (a2) TSH-PFM adiabatic  $S_0$ ,  $S_1$ , and  $S_2$  electronic potentials (black) using the same line styles as in (a1). (b1), (b2) same as (a1), (a2), but for TSH-EDC. (c1), (c2) same as (a1), (a2), but for TSH-ND. All TSH results have been obtained for respective ensembles of 1000 trajectories, see the main text.

## S3 Molecular geometries and frequencies

### S3.1 Lithium hydride

Optimized geometry of LiH, obtained as described in the main text. The bondlength is 3.158 a.u. (1.671 Å).

| # | atom | x [a.u.]       | y [a.u.]       | z [a.u.]        |
|---|------|----------------|----------------|-----------------|
| 1 | Li   | 0.00000000E+00 | 0.00000000E+00 | 1.57880975E+00  |
| 2 | H    | 0.00000000E+00 | 0.00000000E+00 | -1.57880975E+00 |

Harmonic frequency of LiH, obtained as described in the main text.

| mode | [cm <sup>-1</sup> ] | [eV]        | [a.u.]      |
|------|---------------------|-------------|-------------|
| 1    | 1.27078E+03         | 1.57556E-01 | 5.79009E-03 |

### S3.2 Glycine

Optimized geometry of the I<sub>p</sub> conformer of glycine, obtained as described in the main text, and in Ref. ? .

| #  | atom | x [a.u.]        | y [a.u.]        | z [a.u.]        |
|----|------|-----------------|-----------------|-----------------|
| 1  | C    | -2.14996201E-01 | 2.62921239E+00  | 6.63123794E-04  |
| 2  | N    | 3.98901286E-01  | -4.98748802E-02 | 7.45780415E-04  |
| 3  | C    | -3.02726220E+00 | 3.22335434E+00  | 7.78038040E-04  |
| 4  | O    | -3.45025189E+00 | 5.75216762E+00  | 7.38315997E-04  |
| 5  | O    | -4.70818622E+00 | 1.65803639E+00  | 6.94512145E-04  |
| 6  | H    | -5.28321740E+00 | 5.92653256E+00  | 7.54888895E-04  |
| 7  | H    | 6.31754756E-01  | 3.56172806E+00  | 1.66292777E+00  |
| 8  | H    | 6.31639729E-01  | 3.56159565E+00  | -1.66173458E+00 |
| 9  | H    | -4.99920281E-01 | -8.49347517E-01 | -1.51460589E+00 |
| 10 | H    | -4.99631606E-01 | -8.49183810E-01 | 1.51635457E+00  |

Harmonic normal mode frequencies of the I<sub>p</sub> conformer of glycine, obtained as described in the main text, and in Ref. ? .

| mode | [cm <sup>-1</sup> ] | [eV]        | [a.u.]      |
|------|---------------------|-------------|-------------|
| 1    | 7.37532E+01         | 9.14423E-03 | 3.36044E-04 |
| 2    | 2.58736E+02         | 3.20792E-02 | 1.17889E-03 |
| 3    | 2.66285E+02         | 3.30151E-02 | 1.21328E-03 |
| 4    | 4.72463E+02         | 5.85780E-02 | 2.15270E-03 |
| 5    | 5.18476E+02         | 6.42828E-02 | 2.36235E-03 |
| 6    | 6.41123E+02         | 7.94891E-02 | 2.92117E-03 |
| 7    | 6.70373E+02         | 8.31156E-02 | 3.05444E-03 |
| 8    | 8.53511E+02         | 1.05822E-01 | 3.88888E-03 |
| 9    | 9.30071E+02         | 1.15314E-01 | 4.23771E-03 |
| 10   | 9.90731E+02         | 1.22835E-01 | 4.51410E-03 |
| 11   | 1.16341E+03         | 1.44244E-01 | 5.30088E-03 |
| 12   | 1.18686E+03         | 1.47152E-01 | 5.40774E-03 |
| 13   | 1.20277E+03         | 1.49125E-01 | 5.48023E-03 |
| 14   | 1.32638E+03         | 1.64450E-01 | 6.04343E-03 |
| 15   | 1.40467E+03         | 1.74157E-01 | 6.40013E-03 |
| 16   | 1.43436E+03         | 1.77838E-01 | 6.53542E-03 |
| 17   | 1.46568E+03         | 1.81721E-01 | 6.67814E-03 |
| 18   | 1.67288E+03         | 2.07410E-01 | 7.62219E-03 |
| 19   | 1.84797E+03         | 2.29119E-01 | 8.41995E-03 |
| 20   | 3.10734E+03         | 3.85261E-01 | 1.41581E-02 |
| 21   | 3.15915E+03         | 3.91685E-01 | 1.43942E-02 |
| 22   | 3.51392E+03         | 4.35670E-01 | 1.60106E-02 |
| 23   | 3.59606E+03         | 4.45855E-01 | 1.63849E-02 |
| 24   | 3.77639E+03         | 4.68212E-01 | 1.72065E-02 |

### S3.3 1,2-Dithiane

Optimized geometry of 1,2-dithiane, obtained as described in the main text.

| #  | atom | x [a.u.]        | y [a.u.]        | z [a.u.]        |
|----|------|-----------------|-----------------|-----------------|
| 1  | S    | -1.94146093E+00 | 5.11947821E-01  | 1.94056584E+00  |
| 2  | S    | 1.94148330E+00  | -5.11947361E-01 | 1.94054431E+00  |
| 3  | C    | 2.83872502E+00  | 9.06955407E-01  | -1.06372596E+00 |
| 4  | C    | -1.43214337E+00 | 2.24583539E-01  | -3.32145528E+00 |
| 5  | C    | 1.43210703E+00  | -2.24583684E-01 | -3.32147117E+00 |
| 6  | C    | -2.83873617E+00 | -9.06955299E-01 | -1.06369424E+00 |
| 7  | H    | -2.21481139E+00 | -5.98205743E-01 | -5.03354170E+00 |
| 8  | H    | -1.81397933E+00 | 2.23970159E+00  | -3.40241744E+00 |
| 9  | H    | 2.21475603E+00  | 5.98205350E-01  | -5.03356640E+00 |
| 10 | H    | 1.81394206E+00  | -2.23970175E+00 | -3.40243732E+00 |
| 11 | H    | -2.55373940E+00 | -2.92955792E+00 | -9.47166312E-01 |
| 12 | H    | -4.85083245E+00 | -5.62762143E-01 | -1.24002709E+00 |
| 13 | H    | 2.55372956E+00  | 2.92955804E+00  | -9.47195081E-01 |
| 14 | H    | 4.85081933E+00  | 5.62762219E-01  | -1.24008122E+00 |

Harmonic normal mode frequencies of 1,2-dithiane obtained as described in the main text.

| mode | [cm <sup>-1</sup> ] | [eV]        | [a.u.]      |
|------|---------------------|-------------|-------------|
| 1    | 1.79074E+02         | 2.22023E-02 | 8.15919E-04 |
| 2    | 2.32990E+02         | 2.88871E-02 | 1.06158E-03 |
| 3    | 3.12474E+02         | 3.87419E-02 | 1.42374E-03 |
| 4    | 3.57356E+02         | 4.43065E-02 | 1.62823E-03 |
| 5    | 3.93085E+02         | 4.87364E-02 | 1.79103E-03 |
| 6    | 4.59064E+02         | 5.69167E-02 | 2.09165E-03 |
| 7    | 5.28013E+02         | 6.54653E-02 | 2.40580E-03 |
| 8    | 7.17255E+02         | 8.89283E-02 | 3.26805E-03 |
| 9    | 7.24709E+02         | 8.98525E-02 | 3.30202E-03 |
| 10   | 8.65891E+02         | 1.07357E-01 | 3.94529E-03 |
| 11   | 9.10956E+02         | 1.12944E-01 | 4.15062E-03 |
| 12   | 9.65170E+02         | 1.19666E-01 | 4.39764E-03 |
| 13   | 1.01465E+03         | 1.25801E-01 | 4.62310E-03 |
| 14   | 1.06595E+03         | 1.32161E-01 | 4.85681E-03 |
| 15   | 1.14516E+03         | 1.41982E-01 | 5.21774E-03 |
| 16   | 1.17144E+03         | 1.45240E-01 | 5.33749E-03 |
| 17   | 1.23940E+03         | 1.53666E-01 | 5.64710E-03 |
| 18   | 1.30103E+03         | 1.61307E-01 | 5.92792E-03 |
| 19   | 1.38072E+03         | 1.71188E-01 | 6.29104E-03 |
| 20   | 1.39375E+03         | 1.72803E-01 | 6.35039E-03 |
| 21   | 1.45720E+03         | 1.80669E-01 | 6.63948E-03 |
| 22   | 1.47390E+03         | 1.82741E-01 | 6.71560E-03 |
| 23   | 1.52035E+03         | 1.88499E-01 | 6.92720E-03 |
| 24   | 1.54035E+03         | 1.90979E-01 | 7.01834E-03 |
| 25   | 1.60667E+03         | 1.99202E-01 | 7.32053E-03 |
| 26   | 1.61110E+03         | 1.99751E-01 | 7.34070E-03 |
| 27   | 1.62638E+03         | 2.01645E-01 | 7.41031E-03 |
| 28   | 1.63813E+03         | 2.03102E-01 | 7.46387E-03 |
| 29   | 3.19337E+03         | 3.95927E-01 | 1.45501E-02 |
| 30   | 3.20797E+03         | 3.97738E-01 | 1.46166E-02 |
| 31   | 3.23036E+03         | 4.00514E-01 | 1.47186E-02 |
| 32   | 3.23618E+03         | 4.01235E-01 | 1.47451E-02 |
| 33   | 3.24236E+03         | 4.02002E-01 | 1.47733E-02 |
| 34   | 3.24930E+03         | 4.02863E-01 | 1.48049E-02 |
| 35   | 3.29261E+03         | 4.08232E-01 | 1.50022E-02 |
| 36   | 3.29334E+03         | 4.08322E-01 | 1.50056E-02 |

## Notes and references

- M. Richter, P. Marquetand, J. González-Vázquez, I. Sola and L. González, *J. Chem. Theory Comput.*, 2011, **7**, 1253–1258.
- G. Grell, J. González-Vázquez, F. Fernández-Villoria, A. Palacios and F. Martín, *J. Chem. Theory Comput.*, 2025, **21**, 10645–10668.
- G. Granucci and M. Persico, *J. Chem. Phys.*, 2007, **126**, 134114.
- J. C. Tully, *J. Chem. Phys.*, 1990, **93**, 1061–1071.
- J. Galiana, S. M. Cavaletto, G. Grell, F. Fernández-Villoria, A. Palacios, J. González-Vázquez and F. Martín, *J. Chem. Theory Comput.*, 2026, **22**, 1224–1243.
